# Supplementary material for: Toward highly efficient hyperfluorescence-based emitters through excited-states alignment using novel optimally tuned range-separated models
Source: Royal Society of Chemistry journal article supplement (doi:10.1039/d2cp03395j), 2022-01-01
Supplement: d2cp03395j1.pdf [file d2cp03395j1.pdf]

Supporting Information for the paper entitled:

**Toward Highly Efficient Hyperfluorescence-based Emitters through Excited-States  
Alignment Using Novel Optimally Tuned Range-Separated Models**

Mojtaba Alipour\* and Tahereh Izadkhast

*Department of Chemistry, School of Science, Shiraz University, Shiraz 71946-84795, Iran*

**AUTHOR INFORMATION**

**\* Corresponding Author.**

**E-mail:** malipour@shirazu.ac.ir.

**Fax:** +98 71 36460788.

**Phone:** +98 71 36137160.

---

**Table S1.** The computed values of the singlet excitation energies within the frameworks of the OT-RSHs, OT-RSHs-PCM, and OT-SRSHs based on the BLYP DFA alongside the corresponding experimental data (eV) for the experimentally known FEs under study. Also given in the table are the related statistical metrics in boldface.

| Functionals                               | Emitter   | $S_1^{\text{FE}}$ | $S_1^{\text{FE}}$ (exp.) | <b>MSD</b>  | <b>MAD</b>  | <b>RMSD</b> |
|-------------------------------------------|-----------|-------------------|--------------------------|-------------|-------------|-------------|
| OT-RSH<br>$\alpha = 0.0, \beta = 1.0$     | TBPe      | 2.97              | 2.69 <sup>a</sup>        | <b>0.13</b> | <b>0.20</b> | <b>0.22</b> |
|                                           | TTPA      | 2.19              | 2.34 <sup>a</sup>        |             |             |             |
|                                           | Terrylene | 2.44              | 2.16 <sup>b</sup>        |             |             |             |
|                                           | TBRb      | 2.28              | 2.18 <sup>a</sup>        |             |             |             |
| OT-RSH<br>$\alpha = 0.1, \beta = 0.9$     | TBPe      | 3.00              | 2.69 <sup>a</sup>        | <b>0.17</b> | <b>0.19</b> | <b>0.22</b> |
|                                           | TTPA      | 2.30              | 2.34 <sup>a</sup>        |             |             |             |
|                                           | Terrylene | 2.45              | 2.16 <sup>b</sup>        |             |             |             |
|                                           | TBRb      | 2.30              | 2.18 <sup>a</sup>        |             |             |             |
| OT-RSH<br>$\alpha = 0.2, \beta = 0.8$     | TBPe      | 3.04              | 2.69 <sup>a</sup>        | <b>0.22</b> | <b>0.22</b> | <b>0.25</b> |
|                                           | TTPA      | 2.43              | 2.34 <sup>a</sup>        |             |             |             |
|                                           | Terrylene | 2.48              | 2.16 <sup>b</sup>        |             |             |             |
|                                           | TBRb      | 2.32              | 2.18 <sup>a</sup>        |             |             |             |
| OT-RSH<br>$\alpha = 0.3, \beta = 0.7$     | TBPe      | 3.08              | 2.69 <sup>a</sup>        | <b>0.28</b> | <b>0.28</b> | <b>0.29</b> |
|                                           | TTPA      | 2.56              | 2.34 <sup>a</sup>        |             |             |             |
|                                           | Terrylene | 2.50              | 2.16 <sup>b</sup>        |             |             |             |
|                                           | TBRb      | 2.34              | 2.18 <sup>a</sup>        |             |             |             |
| OT-RSH<br>$\alpha = 0.4, \beta = 0.6$     | TBPe      | 3.12              | 2.69 <sup>a</sup>        | <b>0.34</b> | <b>0.34</b> | <b>0.35</b> |
|                                           | TTPA      | 2.71              | 2.34 <sup>a</sup>        |             |             |             |
|                                           | Terrylene | 2.52              | 2.16 <sup>b</sup>        |             |             |             |
|                                           | TBRb      | 2.36              | 2.18 <sup>a</sup>        |             |             |             |
| OT-RSH-PCM<br>$\alpha = 0.0, \beta = 1.0$ | TBPe      | 2.87              | 2.69 <sup>a</sup>        | <b>0.04</b> | <b>0.11</b> | <b>0.13</b> |
|                                           | TTPA      | 2.19              | 2.34 <sup>a</sup>        |             |             |             |
|                                           | Terrylene | 2.25              | 2.16 <sup>b</sup>        |             |             |             |
|                                           | TBRb      | 2.22              | 2.18 <sup>a</sup>        |             |             |             |
| OT-RSH-PCM<br>$\alpha = 0.1, \beta = 0.9$ | TBPe      | 2.90              | 2.69 <sup>a</sup>        | <b>0.08</b> | <b>0.10</b> | <b>0.12</b> |
|                                           | TTPA      | 2.30              | 2.34 <sup>a</sup>        |             |             |             |
|                                           | Terrylene | 2.26              | 2.16 <sup>b</sup>        |             |             |             |
|                                           | TBRb      | 2.24              | 2.18 <sup>a</sup>        |             |             |             |
| OT-RSH-PCM<br>$\alpha = 0.2, \beta = 0.8$ | TBPe      | 2.93              | 2.69 <sup>a</sup>        | <b>0.13</b> | <b>0.13</b> | <b>0.15</b> |
|                                           | TTPA      | 2.42              | 2.34 <sup>a</sup>        |             |             |             |
|                                           | Terrylene | 2.28              | 2.16 <sup>b</sup>        |             |             |             |
|                                           | TBRb      | 2.26              | 2.18 <sup>a</sup>        |             |             |             |
|                                           | TBPe      | 2.97              | 2.69 <sup>a</sup>        |             |             |             |

|                                           |           |      |                   |              |             |             |
|-------------------------------------------|-----------|------|-------------------|--------------|-------------|-------------|
| OT-RSH-PCM<br>$\alpha = 0.3, \beta = 0.7$ | TTPA      | 2.55 | 2.34 <sup>a</sup> | <b>0.18</b>  | <b>0.18</b> | <b>0.19</b> |
|                                           | Terrylene | 2.30 | 2.16 <sup>b</sup> |              |             |             |
|                                           | TBRb      | 2.27 | 2.18 <sup>a</sup> |              |             |             |
| OT-RSH-PCM<br>$\alpha = 0.4, \beta = 0.6$ | TBPe      | 3.01 | 2.69 <sup>a</sup> | <b>0.24</b>  | <b>0.24</b> | <b>0.26</b> |
|                                           | TTPA      | 2.69 | 2.34 <sup>a</sup> |              |             |             |
|                                           | Terrylene | 2.32 | 2.16 <sup>b</sup> |              |             |             |
|                                           | TBRb      | 2.30 | 2.18 <sup>a</sup> |              |             |             |
| OT-SRSH<br>$\alpha = 0.0, \beta = 0.42$   | TBPe      | 2.81 | 2.69 <sup>a</sup> | <b>-0.09</b> | <b>0.23</b> | <b>0.29</b> |
|                                           | TTPA      | 1.79 | 2.34 <sup>a</sup> |              |             |             |
|                                           | Terrylene | 2.32 | 2.16 <sup>b</sup> |              |             |             |
|                                           | TBRb      | 2.10 | 2.18 <sup>a</sup> |              |             |             |
| OT-SRSH<br>$\alpha = 0.1, \beta = 0.32$   | TBPe      | 2.87 | 2.69 <sup>a</sup> | <b>-0.01</b> | <b>0.20</b> | <b>0.23</b> |
|                                           | TTPA      | 1.96 | 2.34 <sup>a</sup> |              |             |             |
|                                           | Terrylene | 2.35 | 2.16 <sup>b</sup> |              |             |             |
|                                           | TBRb      | 2.15 | 2.18 <sup>a</sup> |              |             |             |
| OT-SRSH<br>$\alpha = 0.2, \beta = 0.22$   | TBPe      | 2.94 | 2.69 <sup>a</sup> | <b>0.08</b>  | <b>0.18</b> | <b>0.20</b> |
|                                           | TTPA      | 2.15 | 2.34 <sup>a</sup> |              |             |             |
|                                           | Terrylene | 2.40 | 2.16 <sup>b</sup> |              |             |             |
|                                           | TBRb      | 2.21 | 2.18 <sup>a</sup> |              |             |             |
| OT-SRSH<br>$\alpha = 0.3, \beta = 0.12$   | TBPe      | 3.00 | 2.69 <sup>a</sup> | <b>0.17</b>  | <b>0.17</b> | <b>0.21</b> |
|                                           | TTPA      | 2.36 | 2.34 <sup>a</sup> |              |             |             |
|                                           | Terrylene | 2.44 | 2.16 <sup>b</sup> |              |             |             |
|                                           | TBRb      | 2.27 | 2.18 <sup>a</sup> |              |             |             |
| OT-SRSH<br>$\alpha = 0.4, \beta = 0.02$   | TBPe      | 3.07 | 2.69 <sup>a</sup> | <b>0.28</b>  | <b>0.28</b> | <b>0.29</b> |
|                                           | TTPA      | 2.59 | 2.34 <sup>a</sup> |              |             |             |
|                                           | Terrylene | 2.49 | 2.16 <sup>b</sup> |              |             |             |
|                                           | TBRb      | 2.34 | 2.18 <sup>a</sup> |              |             |             |

<sup>a</sup> H. Nakanotani, T. Higuchi, T. Furukawa, K. Masui, K. Morimoto, M. Numata, H. Tanaka, Y. Sagara, T. Yasuda and C. Adachi, High-Efficiency Organic Light-Emitting Diodes with Fluorescent Emitters, *Nat. Commun.*, 2014, **5**, 4016-4023.

<sup>b</sup> Y. Avlasevich, C. Kohl and K. Müllen, Facile Synthesis of Terrylene and Its Isomer Benzoindenoperylene, *J. Mater. Chem.*, 2006, **16**, 1053-1057.

**Table S2.** The computed values of the excitation energies (eV) using the BLYP-based OT-RSHs for the experimentally known FEs under study.

| OT-RSHs                     | Emitter   | $S_1^{\text{FE}}$ | $T_1^{\text{FE}}$ | $T_2^{\text{FE}}$ | $T_3^{\text{FE}}$ |
|-----------------------------|-----------|-------------------|-------------------|-------------------|-------------------|
| $\alpha = 0.0, \beta = 1.0$ | TBPe      | 2.97              | 1.47              | 2.93              | 3.17              |
|                             | TTPA      | 2.19              | 1.38              | 2.19              | 2.28              |
|                             | Terrylene | 2.44              | 0.96              | 2.29              | 2.53              |
|                             | TBRb      | 2.28              | 0.91              | 2.31              | 2.94              |
| $\alpha = 0.1, \beta = 0.9$ | TBPe      | 3.00              | 1.45              | 2.93              | 3.17              |
|                             | TTPA      | 2.30              | 1.37              | 2.30              | 2.39              |
|                             | Terrylene | 2.45              | 0.94              | 2.28              | 2.53              |
|                             | TBRb      | 2.30              | 0.88              | 2.31              | 2.98              |
| $\alpha = 0.2, \beta = 0.8$ | TBPe      | 3.04              | 1.44              | 2.93              | 3.18              |
|                             | TTPA      | 2.43              | 1.37              | 2.43              | 2.51              |
|                             | Terrylene | 2.48              | 0.92              | 2.28              | 2.53              |
|                             | TBRb      | 2.32              | 0.84              | 2.30              | 3.02              |
| $\alpha = 0.3, \beta = 0.7$ | TBPe      | 3.08              | 1.42              | 2.92              | 3.18              |
|                             | TTPA      | 2.56              | 1.36              | 2.57              | 2.65              |
|                             | Terrylene | 2.50              | 0.90              | 2.27              | 2.53              |
|                             | TBRb      | 2.34              | 0.80              | 2.29              | 3.06              |
| $\alpha = 0.4, \beta = 0.6$ | TBPe      | 3.12              | 1.40              | 2.92              | 3.18              |
|                             | TTPA      | 2.71              | 1.34              | 2.73              | 2.80              |
|                             | Terrylene | 2.52              | 0.88              | 2.26              | 2.53              |
|                             | TBRb      | 2.36              | 0.76              | 2.28              | 3.10              |

**Table S3.** The computed values of the excitation energies (eV) using the BLYP-based OT-RSHs-PCM for the experimentally known FEs under study.

| OT-RSHs-PCM                 | Emitter   | $S_1^{\text{FE}}$ | $T_1^{\text{FE}}$ | $T_2^{\text{FE}}$ | $T_3^{\text{FE}}$ |
|-----------------------------|-----------|-------------------|-------------------|-------------------|-------------------|
| $\alpha = 0.0, \beta = 1.0$ | TBPe      | 2.87              | 1.47              | 2.94              | 3.17              |
|                             | TTPA      | 2.19              | 1.37              | 2.22              | 2.30              |
|                             | Terrylene | 2.25              | 0.96              | 2.29              | 2.53              |
|                             | TBRb      | 2.22              | 0.91              | 2.32              | 2.94              |
| $\alpha = 0.1, \beta = 0.9$ | TBPe      | 2.90              | 1.46              | 2.93              | 3.18              |
|                             | TTPA      | 2.30              | 1.37              | 2.34              | 2.41              |
|                             | Terrylene | 2.26              | 0.94              | 2.28              | 2.53              |
|                             | TBRb      | 2.24              | 0.88              | 2.31              | 2.98              |
| $\alpha = 0.2, \beta = 0.8$ | TBPe      | 2.93              | 1.44              | 2.93              | 3.18              |
|                             | TTPA      | 2.42              | 1.36              | 2.46              | 2.53              |
|                             | Terrylene | 2.28              | 0.93              | 2.28              | 2.53              |
|                             | TBRb      | 2.26              | 0.84              | 2.30              | 3.02              |
| $\alpha = 0.3, \beta = 0.7$ | TBPe      | 2.97              | 1.43              | 2.93              | 3.19              |
|                             | TTPA      | 2.55              | 1.35              | 2.60              | 2.66              |
|                             | Terrylene | 2.30              | 0.91              | 2.27              | 2.53              |
|                             | TBRb      | 2.27              | 0.80              | 2.29              | 3.06              |
| $\alpha = 0.4, \beta = 0.6$ | TBPe      | 3.01              | 1.41              | 2.93              | 3.19              |
|                             | TTPA      | 2.69              | 1.34              | 2.76              | 2.82              |
|                             | Terrylene | 2.32              | 0.89              | 2.27              | 2.53              |
|                             | TBRb      | 2.30              | 0.76              | 2.28              | 3.11              |

**Table S4.** The computed values of the excitation energies (eV) using the BLYP-based OT-SRSHs for the experimentally known FEs under study.

| OT-SRSHs                             | Emitter   | $S_1^{\text{FE}}$ | $T_1^{\text{FE}}$ | $T_2^{\text{FE}}$ | $T_3^{\text{FE}}$ |
|--------------------------------------|-----------|-------------------|-------------------|-------------------|-------------------|
| BLYP<br>$\alpha = 0, \beta = 0.42$   | TBPe      | 2.81              | 1.40              | 2.85              | 3.08              |
|                                      | TTPA      | 1.79              | 1.30              | 1.77              | 1.94              |
|                                      | Terrylene | 2.32              | 0.89              | 2.21              | 2.42              |
|                                      | TBRb      | 2.10              | 0.88              | 2.26              | 2.77              |
| BLYP<br>$\alpha = 0.1, \beta = 0.32$ | TBPe      | 2.87              | 1.40              | 2.86              | 3.09              |
|                                      | TTPA      | 1.96              | 1.32              | 1.93              | 2.06              |
|                                      | Terrylene | 2.35              | 0.88              | 2.22              | 2.44              |
|                                      | TBRb      | 2.15              | 0.85              | 2.27              | 2.85              |
| BLYP<br>$\alpha = 0.2, \beta = 0.22$ | TBPe      | 2.94              | 1.39              | 2.87              | 3.11              |
|                                      | TTPA      | 2.15              | 1.33              | 2.12              | 2.22              |
|                                      | Terrylene | 2.40              | 0.88              | 2.23              | 2.46              |
|                                      | TBRb      | 2.21              | 0.82              | 2.27              | 2.93              |
| BLYP<br>$\alpha = 0.3, \beta = 0.12$ | TBPe      | 3.00              | 1.38              | 2.88              | 3.13              |
|                                      | TTPA      | 2.36              | 1.33              | 2.34              | 2.43              |
|                                      | Terrylene | 2.44              | 0.87              | 2.24              | 2.47              |
|                                      | TBRb      | 2.27              | 0.79              | 2.27              | 3.00              |
| BLYP<br>$\alpha = 0.4, \beta = 0.02$ | TBPe      | 3.07              | 1.38              | 2.89              | 3.15              |
|                                      | TTPA      | 2.59              | 1.33              | 2.60              | 2.67              |
|                                      | Terrylene | 2.49              | 0.86              | 2.24              | 2.49              |
|                                      | TBRb      | 2.34              | 0.75              | 2.26              | 3.07              |

**Table S5.** The computed values of the excitation energies (eV) using the PBE-based OT-RSHs-PCM for the experimentally known FEs under study.

| OT-RSHs-PCM                 | Emitter   | $S_1^{\text{FE}}$ | $T_1^{\text{FE}}$ | $T_2^{\text{FE}}$ | $T_3^{\text{FE}}$ |
|-----------------------------|-----------|-------------------|-------------------|-------------------|-------------------|
| $\alpha = 0, \beta = 1.0$   | TBPe      | 2.89              | 1.47              | 2.93              | 3.17              |
|                             | TTPA      | 2.17              | 1.35              | 2.19              | 2.28              |
|                             | Terrylene | 2.26              | 0.96              | 2.28              | 2.52              |
|                             | TBRb      | 2.22              | 0.90              | 2.30              | 2.94              |
| $\alpha = 0.1, \beta = 0.9$ | TBPe      | 2.92              | 1.45              | 2.93              | 3.17              |
|                             | TTPA      | 2.28              | 1.35              | 2.31              | 2.38              |
|                             | Terrylene | 2.27              | 0.94              | 2.28              | 2.52              |
|                             | TBRb      | 2.24              | 0.86              | 2.30              | 2.98              |
| $\alpha = 0.2, \beta = 0.8$ | TBPe      | 2.95              | 1.44              | 2.92              | 3.17              |
|                             | TTPA      | 2.39              | 1.35              | 2.43              | 2.49              |
|                             | Terrylene | 2.30              | 0.92              | 2.27              | 2.52              |
|                             | TBRb      | 2.26              | 0.82              | 2.29              | 3.02              |
| $\alpha = 0.3, \beta = 0.7$ | TBPe      | 2.99              | 1.42              | 2.92              | 3.18              |
|                             | TTPA      | 2.52              | 1.34              | 2.57              | 2.63              |
|                             | Terrylene | 2.31              | 0.90              | 2.26              | 2.52              |
|                             | TBRb      | 2.28              | 0.78              | 2.28              | 3.06              |
| $\alpha = 0.4, \beta = 0.6$ | TBPe      | 3.02              | 1.40              | 2.91              | 3.18              |
|                             | TTPA      | 2.67              | 1.32              | 2.73              | 2.78              |
|                             | Terrylene | 2.34              | 0.88              | 2.25              | 2.52              |
|                             | TBRb      | 2.31              | 0.74              | 2.26              | 3.11              |

**Table S6.** The computed values of the excitation energies (eV) using the TPSS-based OT-RSHs-PCM for the experimentally known FEs under study.

| OT-RSHs-PCM                 | Emitter | $S_1^{\text{FE}}$ | $T_1^{\text{FE}}$ | $T_2^{\text{FE}}$ | $T_3^{\text{FE}}$ |      |
|-----------------------------|---------|-------------------|-------------------|-------------------|-------------------|------|
| $\alpha = 0, \beta = 1.0$   | TPSS    | TBPe              | 2.91              | 1.45              | 2.93              | 3.17 |
|                             |         | TTPA              | 2.24              | 1.35              | 2.27              | 2.34 |
|                             |         | Terrylene         | 2.28              | 0.94              | 2.28              | 2.52 |
|                             |         | TBRb              | 2.24              | 0.87              | 2.29              | 2.97 |
| $\alpha = 0.1, \beta = 0.9$ | TPSS    | TBPe              | 2.93              | 1.44              | 2.93              | 3.17 |
|                             |         | TTPA              | 2.34              | 1.34              | 2.37              | 2.44 |
|                             |         | Terrylene         | 2.29              | 0.92              | 2.27              | 2.52 |
|                             |         | TBRb              | 2.26              | 0.83              | 2.29              | 3.01 |
| $\alpha = 0.2, \beta = 0.8$ | TPSS    | TBPe              | 2.97              | 1.42              | 2.92              | 3.18 |
|                             |         | TTPA              | 2.46              | 1.34              | 2.49              | 2.55 |
|                             |         | Terrylene         | 2.31              | 0.91              | 2.27              | 2.52 |
|                             |         | TBRb              | 2.27              | 0.80              | 2.28              | 3.05 |
| $\alpha = 0.3, \beta = 0.7$ | TPSS    | TBPe              | 3.00              | 1.41              | 2.92              | 3.18 |
|                             |         | TTPA              | 2.58              | 1.33              | 2.63              | 2.68 |
|                             |         | Terrylene         | 2.32              | 0.89              | 2.26              | 2.52 |
|                             |         | TBRb              | 2.29              | 0.76              | 2.27              | 3.09 |
| $\alpha = 0.4, \beta = 0.6$ | TPSS    | TBPe              | 3.04              | 1.39              | 2.91              | 3.18 |
|                             |         | TTPA              | 2.72              | 1.31              | 2.78              | 2.83 |
|                             |         | Terrylene         | 2.35              | 0.87              | 2.25              | 2.52 |
|                             |         | TBRb              | 2.31              | 0.72              | 2.25              | 3.13 |



**Table S7.** The computed values of the singlet-triplet energy gaps (eV) using the PBE-based OT-RSHs-PCM for the experimentally known FEs under study.

| OT-RSHs-PCM                 | Emitter   | $\Delta E_{S_1T_1}$ | $\Delta E_{S_1T_2}$ | $\Delta E_{S_1T_3}$ |
|-----------------------------|-----------|---------------------|---------------------|---------------------|
| $\alpha = 0, \beta = 1.0$   | TBPe      | 1.42                | -0.04               | -0.28               |
|                             | TTPA      | 0.81                | -0.03               | -0.11               |
|                             | Terrylene | 1.31                | -0.02               | -0.26               |
|                             | TBRb      | 1.33                | -0.08               | -0.72               |
| $\alpha = 0.1, \beta = 0.9$ | TBPe      | 1.46                | -0.01               | -0.26               |
|                             | TTPA      | 0.92                | -0.03               | -0.10               |
|                             | Terrylene | 1.34                | 0.00                | -0.25               |
|                             | TBRb      | 1.38                | -0.05               | -0.74               |
| $\alpha = 0.2, \beta = 0.8$ | TBPe      | 1.51                | 0.03                | -0.22               |
|                             | TTPA      | 1.05                | -0.04               | -0.10               |
|                             | Terrylene | 1.38                | 0.03                | -0.23               |
|                             | TBRb      | 1.44                | -0.03               | -0.76               |
| $\alpha = 0.3, \beta = 0.7$ | TBPe      | 1.57                | 0.07                | -0.19               |
|                             | TTPA      | 1.19                | -0.04               | -0.10               |
|                             | Terrylene | 1.42                | 0.05                | -0.21               |
|                             | TBRb      | 1.50                | 0.00                | -0.78               |
| $\alpha = 0.4, \beta = 0.6$ | TBPe      | 1.63                | 0.11                | -0.15               |
|                             | TTPA      | 1.35                | -0.06               | -0.11               |
|                             | Terrylene | 1.46                | 0.08                | -0.18               |
|                             | TBRb      | 1.57                | 0.04                | -0.80               |

**Table S8.** The computed values of the singlet-triplet energy gaps (eV) using the TPSS-based OT-RSHs-PCM for the experimentally known FEs under study.

| OT-RSHs-PCM                         | Emitter   | $\Delta E_{S_1T_1}$ | $\Delta E_{S_1T_2}$ | $\Delta E_{S_1T_3}$ |
|-------------------------------------|-----------|---------------------|---------------------|---------------------|
| TPSS<br>$\alpha = 0, \beta = 1.0$   | TBPe      | 1.45                | -0.02               | -0.26               |
|                                     | TTPA      | 0.89                | -0.03               | -0.10               |
|                                     | Terrylene | 1.33                | 0.00                | -0.25               |
|                                     | TBRb      | 1.37                | -0.05               | -0.74               |
| TPSS<br>$\alpha = 0.1, \beta = 0.9$ | TBPe      | 1.50                | 0.01                | -0.24               |
|                                     | TTPA      | 1.00                | -0.03               | -0.10               |
|                                     | Terrylene | 1.36                | 0.02                | -0.23               |
|                                     | TBRb      | 1.42                | -0.03               | -0.76               |
| TPSS<br>$\alpha = 0.2, \beta = 0.8$ | TBPe      | 1.54                | 0.04                | -0.21               |
|                                     | TTPA      | 1.12                | -0.04               | -0.10               |
|                                     | Terrylene | 1.40                | 0.04                | -0.21               |
|                                     | TBRb      | 1.48                | 0.00                | -0.78               |
| TPSS<br>$\alpha = 0.3, \beta = 0.7$ | TBPe      | 1.59                | 0.08                | -0.18               |
|                                     | TTPA      | 1.25                | -0.05               | -0.11               |
|                                     | Terrylene | 1.44                | 0.07                | -0.20               |
|                                     | TBRb      | 1.53                | 0.02                | -0.80               |
| TPSS<br>$\alpha = 0.4, \beta = 0.6$ | TBPe      | 1.65                | 0.12                | -0.14               |
|                                     | TTPA      | 1.40                | -0.06               | -0.12               |
|                                     | Terrylene | 1.48                | 0.10                | -0.17               |
|                                     | TBRb      | 1.60                | 0.06                | -0.81               |

**Table S9.** The computed values of the singlet-triplet energy gaps within the framework of the OT-RSHs-PCM based on the BLYP DFA for different combinations of  $\alpha$  and  $\beta$  parameters alongside the corresponding reference experimental data (eV) for the benchmarked set of TADF molecules.

| Molecule              | $\alpha = 0.0,$<br>$\beta = 1.0$ | $\alpha = 0.1,$<br>$\beta = 0.9$ | $\alpha = 0.2,$<br>$\beta = 0.8$ | $\alpha = 0.3,$<br>$\beta = 0.7$ | Ref. |
|-----------------------|----------------------------------|----------------------------------|----------------------------------|----------------------------------|------|
| 2CzPN <sup>a</sup>    | 0.42                             | 0.44                             | 0.48                             | 0.54                             | 0.31 |
| 4CzIPN <sup>a</sup>   | 0.12                             | 0.13                             | 0.14                             | 0.16                             | 0.10 |
| 4CzPN <sup>a</sup>    | 0.12                             | 0.15                             | 0.19                             | 0.25                             | 0.15 |
| 4CzTPN <sup>a</sup>   | 0.14                             | 0.15                             | 0.16                             | 0.17                             | 0.09 |
| ACRFLCN <sup>a</sup>  | 0.14                             | 0.19                             | 0.27                             | 0.38                             | 0.24 |
| DMAC-DPS <sup>b</sup> | 0.02                             | 0.02                             | 0.02                             | 0.02                             | 0.09 |
| DMOC-DPS <sup>c</sup> | 0.61                             | 0.64                             | 0.65                             | 0.69                             | 0.24 |
| PPZ-DPO <sup>b</sup>  | 0.03                             | 0.04                             | 0.06                             | 0.12                             | 0.09 |
| PXZ-DPS <sup>b</sup>  | 0.05                             | 0.07                             | 0.13                             | 0.26                             | 0.08 |
| PXZ-TRZ <sup>a</sup>  | 0.01                             | 0.01                             | 0.05                             | 0.10                             | 0.06 |

<sup>a</sup> S. Huang, Q. Zhang, Y. Shiota, T. Nakagawa, K. Kuwabara, K. Yoshizawa and C. Adachi, Computational Prediction for Singlet- and Triplet-Transition Energies of Charge-Transfer Compounds, *J. Chem. Theory Comput.*, 2013, **9**, 3872-3877.

<sup>b</sup> Q. Zhang, B. Li, S. Huang, H. Nomura, H. Tanaka and C. Adachi, Efficient Blue Organic Light-Emitting Diodes Employing Thermally Activated Delayed Fluorescence, *Nat. Photonics*, 2014, **8**, 326-332.

<sup>c</sup> S. Wu, M. Aonuma, Q. Zhang, S. Huang, T. Nakagawa, K. Kuwabara and C. Adachi, High-Efficiency Deep-Blue Organic Light-Emitting Diodes Based on a Thermally Activated Delayed Fluorescence Emitter, *J. Mater. Chem. C*, 2014, **2**, 421-424.

**Table S10.** The computed values of the excitation energies (eV) using the standard LC functionals and other RSHs for the experimentally known FEs under study.

| Functionals                    | Emitter   | $S_1^{\text{FE}}$ | $T_1^{\text{FE}}$ | $T_2^{\text{FE}}$ | $T_3^{\text{FE}}$ |
|--------------------------------|-----------|-------------------|-------------------|-------------------|-------------------|
| <i>Standard LC functionals</i> |           |                   |                   |                   |                   |
| LC-BLYP                        | TBPe      | 3.33              | 1.51              | 3.00              | 3.28              |
|                                | TTPA      | 3.35              | 1.38              | 3.30              | 3.50              |
|                                | Terrylene | 2.61              | 0.98              | 2.33              | 2.63              |
|                                | TBRb      | 2.62              | 0.74              | 2.33              | 3.30              |
| LC-PBE                         | TBPe      | 3.35              | 1.49              | 2.98              | 3.26              |
|                                | TTPA      | 3.34              | 1.35              | 3.27              | 3.58              |
|                                | Terrylene | 2.62              | 0.96              | 2.31              | 2.61              |
|                                | TBRb      | 2.63              | 0.71              | 2.30              | 3.31              |
| LC-TPSS                        | TBPe      | 3.35              | 1.47              | 2.97              | 3.25              |
|                                | TTPA      | 3.36              | 1.34              | 3.26              | 3.46              |
|                                | Terrylene | 2.62              | 0.95              | 2.30              | 2.60              |
|                                | TBRb      | 2.63              | 0.69              | 2.29              | 3.31              |
| <i>RSHs</i>                    |           |                   |                   |                   |                   |
| $\omega$ B97X-D                | TBPe      | 3.08              | 1.51              | 3.01              | 3.27              |
|                                | TTPA      | 2.84              | 1.41              | 2.95              | 2.99              |
|                                | Terrylene | 2.38              | 0.98              | 2.34              | 2.60              |
|                                | TBRb      | 2.45              | 0.84              | 2.37              | 3.19              |
| CAM-B3LYP                      | TBPe      | 3.05              | 1.45              | 2.95              | 3.21              |
|                                | TTPA      | 2.76              | 1.37              | 2.83              | 2.88              |
|                                | Terrylene | 2.36              | 0.93              | 2.29              | 2.55              |
|                                | TBRb      | 2.39              | 0.79              | 2.32              | 3.14              |
| M11                            | TBPe      | 3.26              | 1.58              | 3.08              | 3.35              |
|                                | TTPA      | 3.05              | 1.44              | 3.18              | 3.21              |
|                                | Terrylene | 2.53              | 1.04              | 2.41              | 2.68              |
|                                | TBRb      | 2.58              | 0.86              | 2.41              | 3.28              |

**Table S11.** The computed values of the excitation energies (eV) using the BLYP-based OT-RSH-PCM ( $\alpha = 0.0, \beta = 1.0$ ) for the theoretically designed emitters.

| Molecule    | $S_1^{\text{FE}}$ | $T_1^{\text{FE}}$ | $T_2^{\text{FE}}$ | $T_2^{\text{FE}}$ |
|-------------|-------------------|-------------------|-------------------|-------------------|
| <b>I</b>    | 2.96              | 1.48              | 2.97              | 3.20              |
| <b>II</b>   | 2.16              | 1.37              | 2.40              | 2.48              |
| <b>III</b>  | 2.24              | 0.99              | 2.20              | 2.68              |
| <b>IV</b>   | 2.13              | 0.94              | 2.11              | 2.45              |
| <b>V</b>    | 2.24              | 0.97              | 2.20              | 2.88              |
| <b>VI</b>   | 2.27              | 0.98              | 2.23              | 2.88              |
| <b>VII</b>  | 2.23              | 0.99              | 2.31              | 2.53              |
| <b>VIII</b> | 2.19              | 0.98              | 2.30              | 2.51              |
